# Supplementary material
Source: publisher site journal article supplement (https://www.dovepress.com/article/supplementary_file/577044/Supplementary%20Figure%201%25252525281%2525252529.docx)
Supplement: Supplementary file 1 [file Supplementary%20Figure%201%25252525281%2525252529.docx]

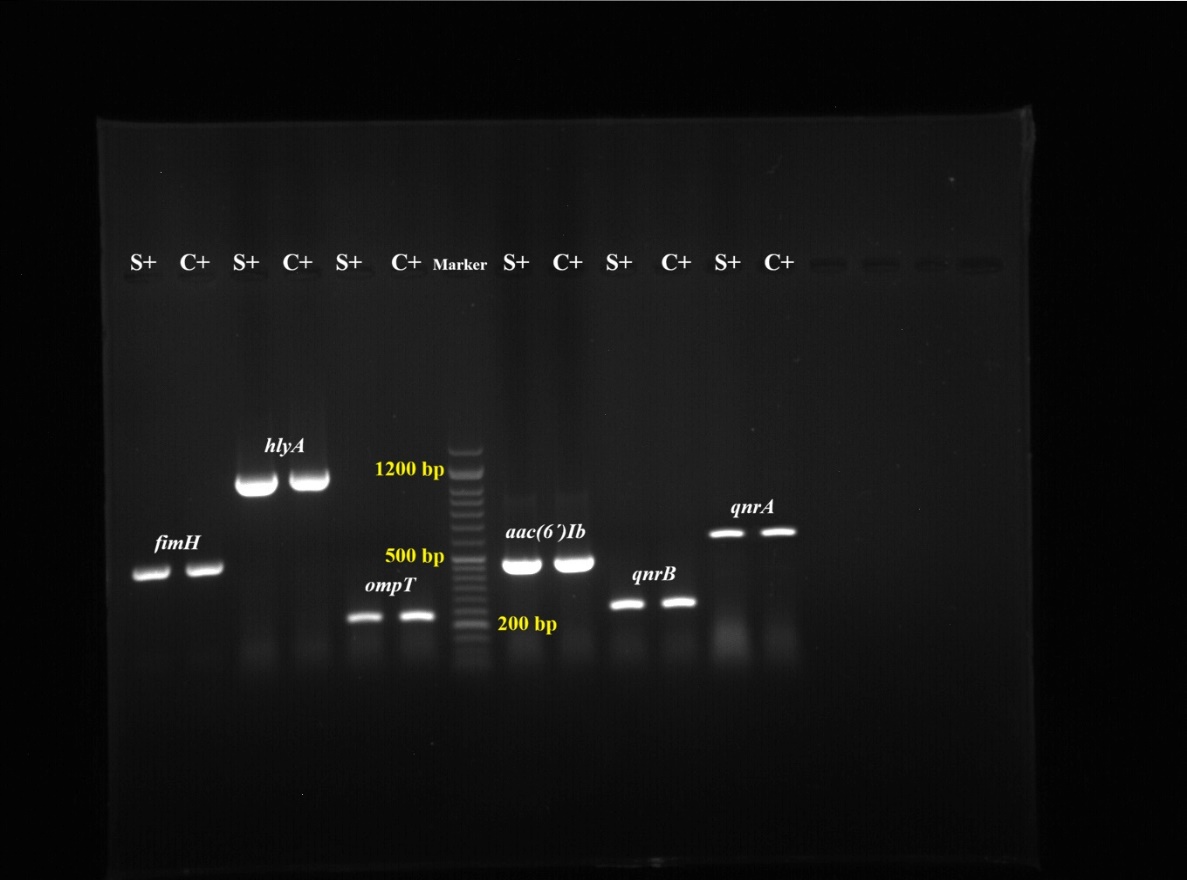

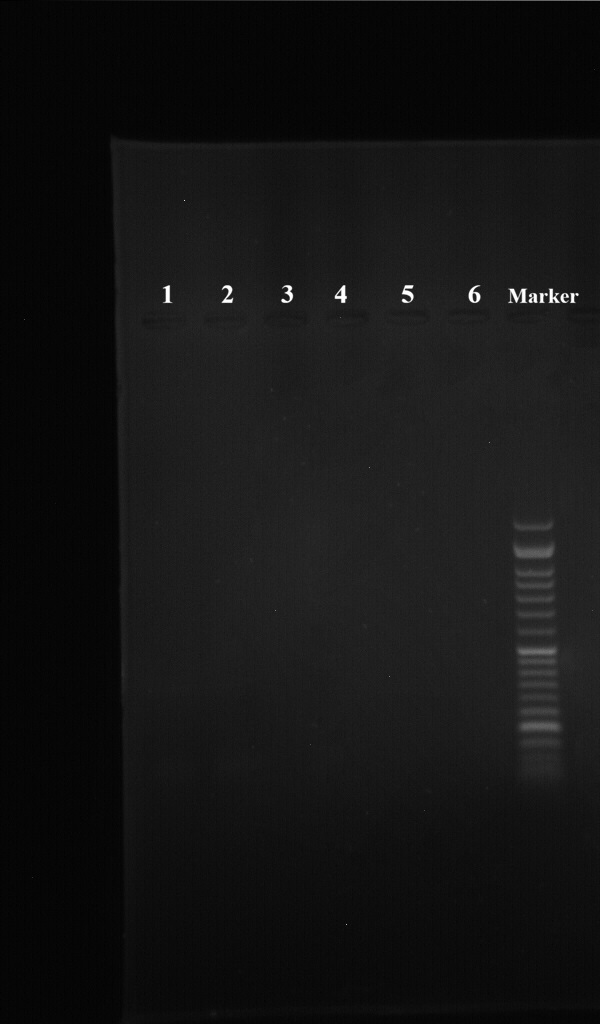


**(A)**

**(B)**

**Supplementary Figure 1.** PCR products of *E. coli* clinical strains. A) Amplification of *fimH*, *hlyA*, *ompT*, *aac(6′)-Ib*, *qnrA*, and *qnrB* genes along with the Molecular size markers (50‐bp DNA ladder). S+ indicates positive samples, and C+ indicates the positive control. B) Negative controls for the same set of genes (*fimH*, *hlyA*, *ompT*, *aac(6′)-Ib*, *qnrA*, and *qnrB*) are shown in the corresponding lanes along with the Molecular size markers (50‐bp DNA ladder).
